# Supplementary material for: Epidemiology and management of 10,486 pediatric fractures in Shenzhen: experience and lessons to be learnt
Source: Springer Nature journal article supplement (doi:10.1186/s12887-022-03199-0), 2022-03-29
Supplement: MOESM1 [file 20264066]

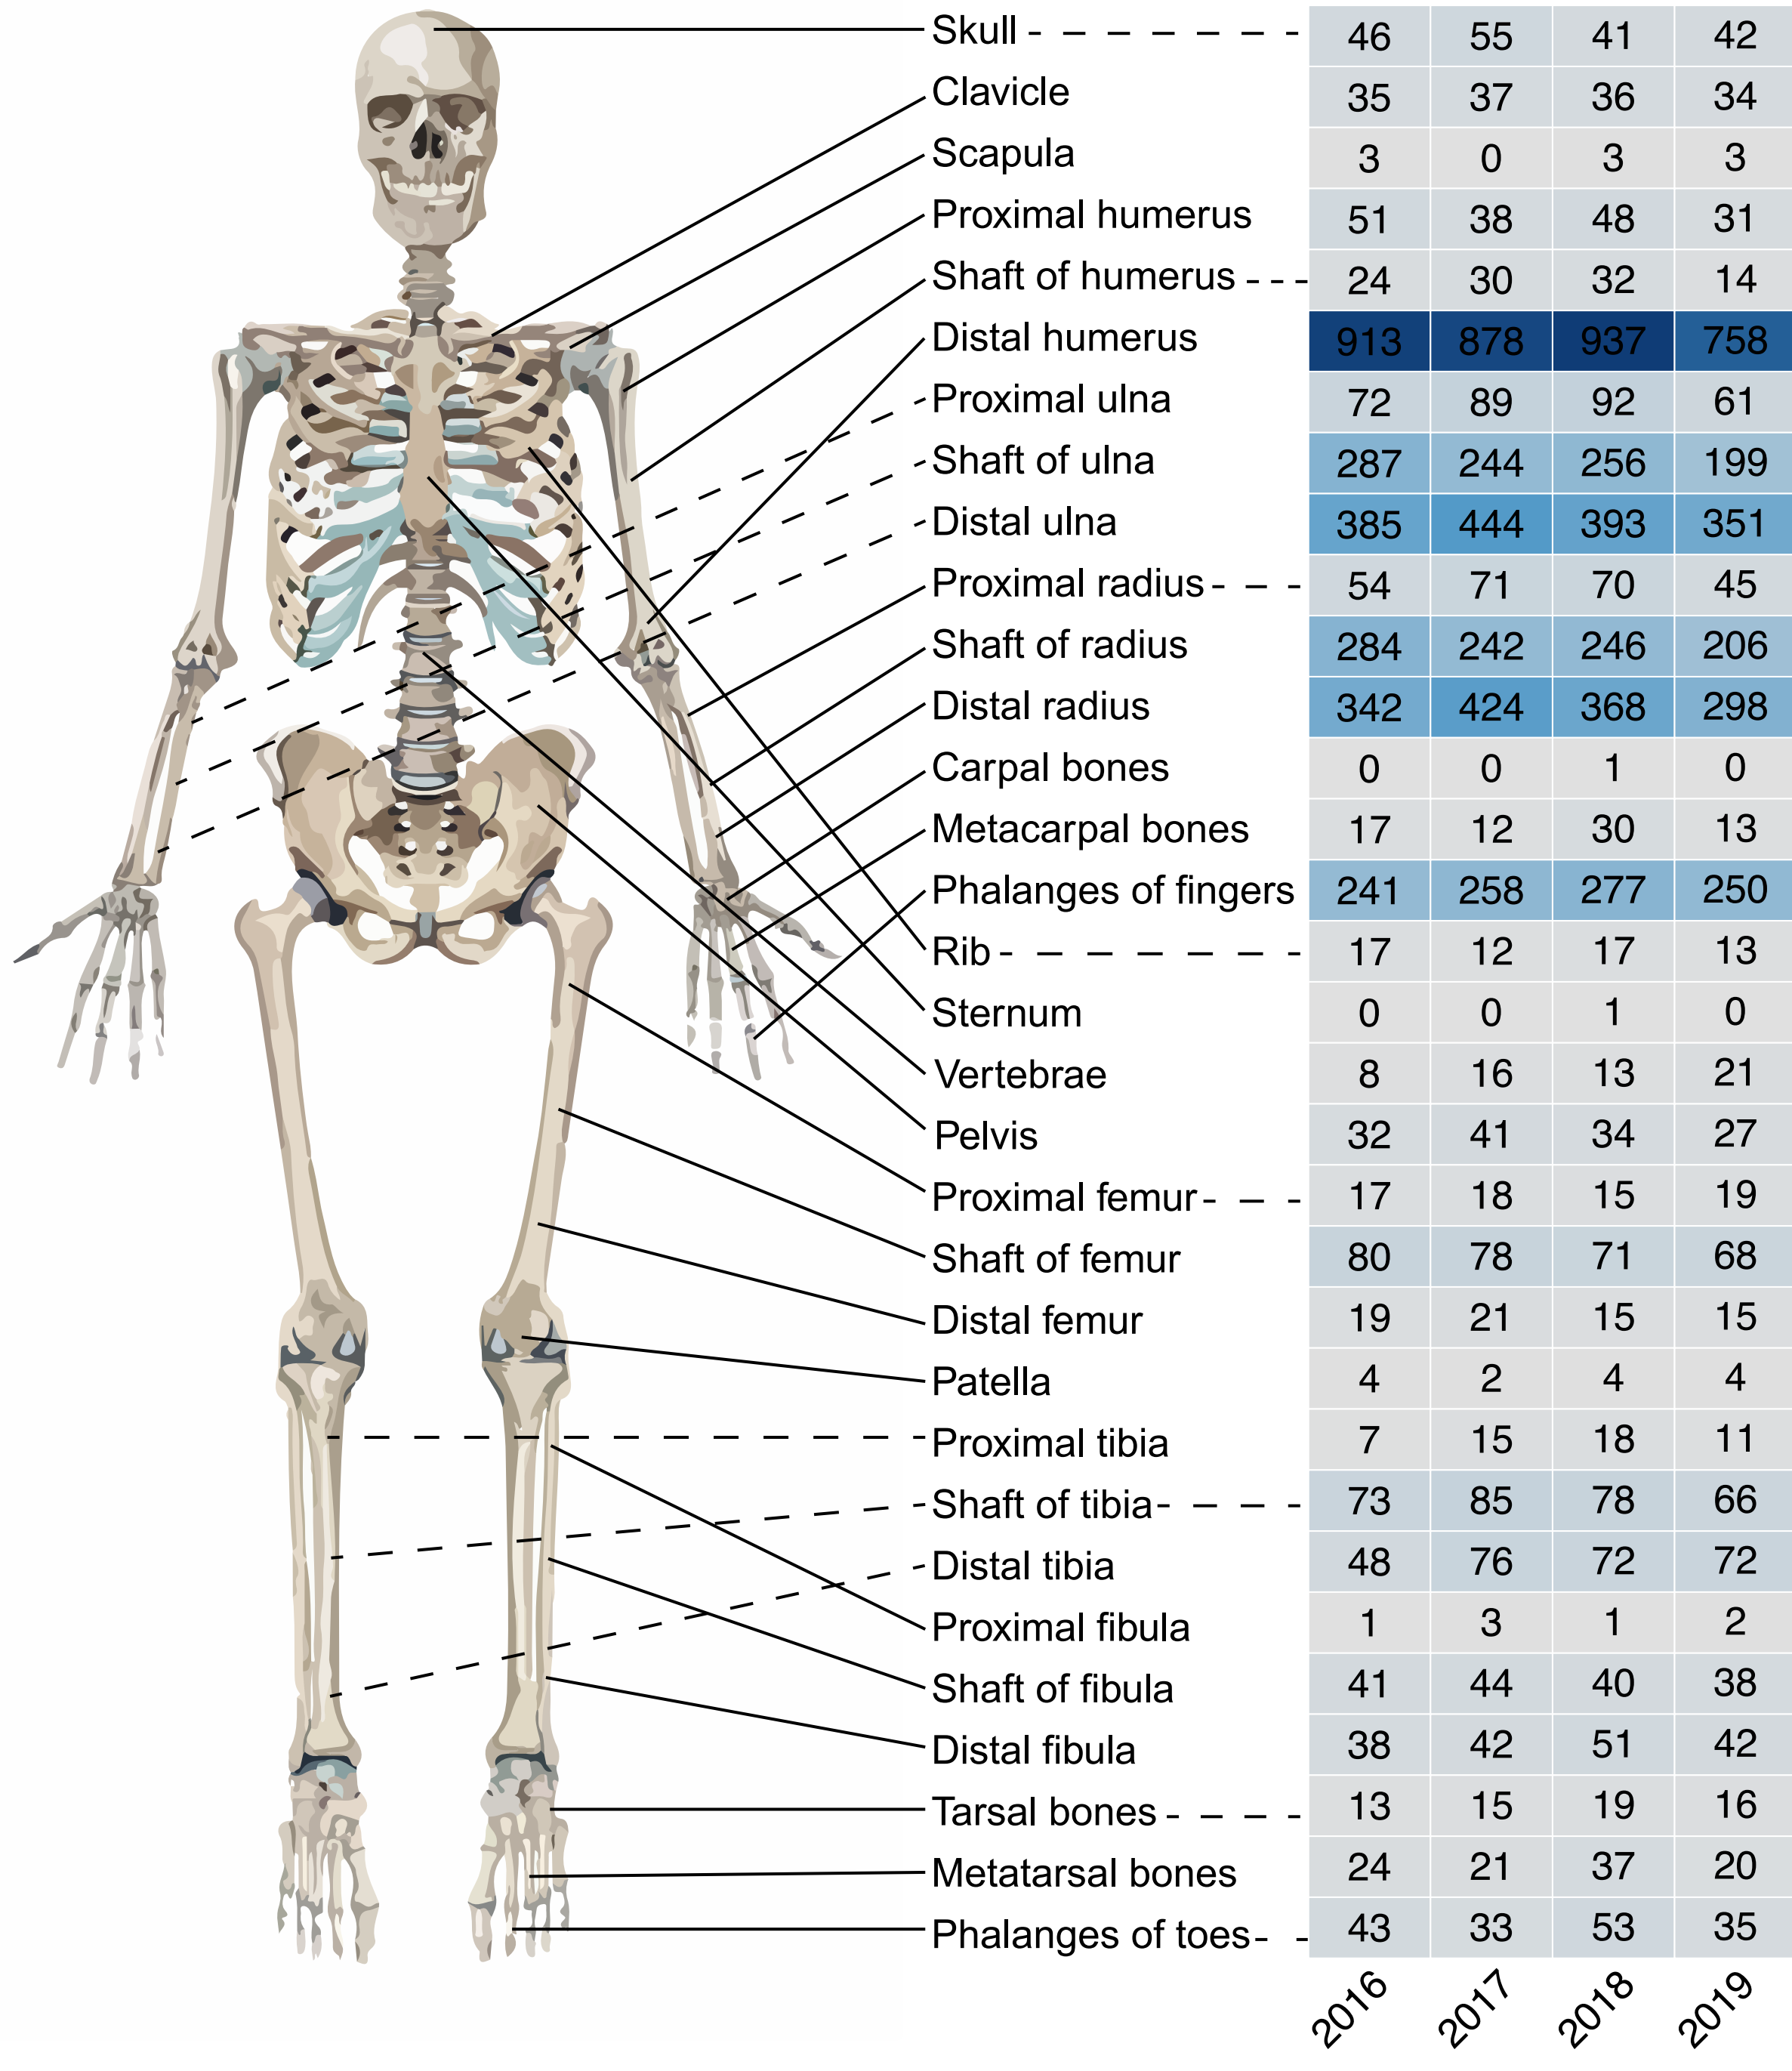

Number of fracture sites

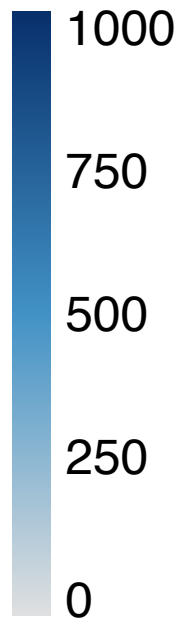

2016 2017 2018 2019  
Years
