# Supplementary material for: Epidemiology and management of 10,486 pediatric fractures in Shenzhen: experience and lessons to be learnt
Source: Springer Nature journal article supplement (doi:10.1186/s12887-022-03199-0), 2022-03-29

A

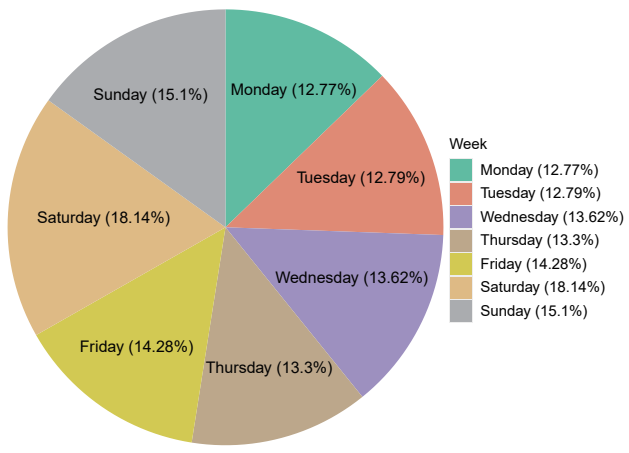

B

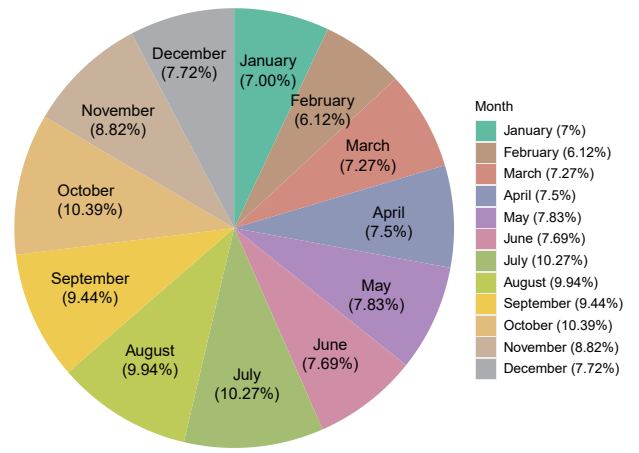

Supplement: MOESM2 [file 20264066]
