# Supplementary material for: Epidemiology and management of 10,486 pediatric fractures in Shenzhen: experience and lessons to be learnt
Source: Springer Nature journal article supplement (doi:10.1186/s12887-022-03199-0), 2022-03-29
Supplement: MOESM4 [file 20264066]

Supplemental table1. Epidemiological characteristics of epiphyseal fractures

| Parameter            | Patients n(%) |
|----------------------|---------------|
| Distal radius        | 405(33.50%)   |
| Phalanges of fingers | 266(22.00%)   |
| Distal humerus       | 163(13.48%)   |
| Distal tibia         | 148(12.24%)   |
| Distal ulna          | 51(4.22%)     |
| Phalanges of toes    | 38(3.14%)     |
| Distal fibula        | 28(2.32%)     |
| Proximal humerus     | 24(1.99%)     |
| Distal femur         | 22(1.82%)     |
| Metatarsal bones     | 21(1.74%)     |
| Proximal tibia       | 14(1.16%)     |
| Metacarpal bones     | 13(1.08%)     |
| Proximal femur       | 5(0.41%)      |
| Proximal radius      | 4(0.33%)      |
| Shaft of fibula      | 3(0.25%)      |
| Proximal ulna        | 2(0.17%)      |
| Shaft of tibia       | 2(0.17%)      |
