# Supplementary material for: Epidemiology and management of 10,486 pediatric fractures in Shenzhen: experience and lessons to be learnt
Source: Springer Nature journal article supplement (doi:10.1186/s12887-022-03199-0), 2022-03-29
Supplement: MOESM5 [file 20264066]

Supplemental table2. The epidemiology of age group according to different etiologies

| Causes of fractures     | Infants | Preschool child | School child | Adolescent |
|-------------------------|---------|-----------------|--------------|------------|
| Road traffic injuries   | 80      | 481             | 303          | 125        |
| Bicycle-spoke injuries  | 12      | 77              | 12           | 2          |
| Falls from vehicles     | 0       | 16              | 7            | 2          |
| Car accident injuries   | 66      | 328             | 199          | 57         |
| Bicycle falls           | 2       | 60              | 85           | 64         |
| Daily-life injuries     | 1042    | 3731            | 3001         | 881        |
| Falls from height       | 8       | 50              | 38           | 18         |
| Crush injuries          | 87      | 156             | 84           | 16         |
| Furniture-related falls | 103     | 171             | 45           | 8          |
| Pinch injuries          | 139     | 236             | 78           | 12         |
| Twist injuries          | 9       | 13              | 12           | 2          |
| Sprains                 | 2       | 10              | 10           | 16         |
| Others                  | 1       | 2               | 1            | 1          |
| Strains                 | 3       | 0               | 4            | 1          |
| Cuts                    | 39      | 86              | 58           | 12         |
| Falls                   | 648     | 2997            | 2667         | 794        |
| Bunk bed falls          | 2       | 10              | 4            | 1          |
| Bites                   | 1       | 0               | 0            | 0          |
| Sports injuries         | 10      | 152             | 305          | 249        |
| Trampoline falls        | 0       | 5               | 4            | 2          |
| Single bar falls        | 0       | 11              | 46           | 41         |
| Slide falls             | 4       | 44              | 23           | 1          |
| Skateboard falls        | 0       | 17              | 36           | 20         |
| Fitness equipment falls | 1       | 8               | 8            | 0          |
| Basketball falls        | 1       | 1               | 21           | 82         |
| Ice skating falls       | 0       | 15              | 46           | 8          |
| Rocking horse falls     | 2       | 4               | 0            | 0          |
| Falls while running     | 1       | 18              | 32           | 45         |
| Balance bike falls      | 1       | 2               | 11           | 5          |
| Swing falls             | 0       | 7               | 6            | 0          |
| Ski falls               | 0       | 0               | 1            | 0          |

|                            |    |    |    |    |
|----------------------------|----|----|----|----|
| Parallel bar falls         | 0  | 1  | 0  | 0  |
| Others                     | 0  | 0  | 0  | 1  |
| Taekwondo falls            | 0  | 1  | 10 | 5  |
| Kick injuries              | 0  | 1  | 9  | 6  |
| Dance falls                | 0  | 5  | 8  | 5  |
| Playground falls           | 0  | 9  | 4  | 1  |
| Falls during physical      |    |    |    |    |
| Education activities       | 0  | 0  | 12 | 14 |
| Soccer falls               | 0  | 4  | 22 | 11 |
| Jump rope falls            | 0  | 0  | 1  | 1  |
| Swimming-related injuries  | 0  | 0  | 0  | 1  |
| Martial arts falls         | 0  | 0  | 5  | 0  |
| Birth injuries             | 75 | 0  | 0  | 0  |
| Abuse injuries             | 0  | 1  | 3  | 0  |
| Iatrogenic injuries        | 1  | 1  | 1  | 0  |
| Unknown causes of fracture | 19 | 14 | 9  | 2  |

---
