# Supplementary material for: Epidemiology and management of 10,486 pediatric fractures in Shenzhen: experience and lessons to be learnt
Source: Springer Nature journal article supplement (doi:10.1186/s12887-022-03199-0), 2022-03-29
Supplement: MOESM6 [file 20264066]

Supplemental table3. Changes in the causes of injuries in different years

| Causes of fractures     | 2016 | 2017 | 2018 | 2019 |
|-------------------------|------|------|------|------|
| Road traffic injuries   | 245  | 308  | 215  | 143  |
| Bicycle-spoke injuries  | 22   | 32   | 31   | 13   |
| Falls from vehicles     | 7    | 8    | 5    | 3    |
| Car accident injuries   | 165  | 178  | 150  | 100  |
| Bicycle falls           | 51   | 90   | 29   | 27   |
| Daily-life injuries     | 2054 | 1873 | 2106 | 1808 |
| Falls from height       | 34   | 24   | 20   | 27   |
| Crush injuries          | 80   | 64   | 93   | 67   |
| Furniture-related falls | 63   | 107  | 79   | 59   |
| Pinch injuries          | 115  | 116  | 109  | 96   |
| Twist injuries          | 6    | 11   | 13   | 4    |
| Sprains                 | 6    | 5    | 10   | 14   |
| Others                  | 1    | 1    | 1    | 1    |
| Strains                 | 4    | 1    | 1    | 2    |
| Cuts                    | 38   | 30   | 60   | 54   |
| Falls                   | 1705 | 1504 | 1717 | 1482 |
| Bunk bed falls          | 2    | 9    | 3    | 2    |
| Bites                   | 0    | 1    | 0    | 0    |
| Sports injuries         | 101  | 253  | 199  | 123  |
| Trampoline falls        | 2    | 3    | 4    | 2    |
| Single bar falls        | 8    | 28   | 37   | 18   |
| Slide falls             | 10   | 32   | 15   | 11   |
| Skateboard falls        | 8    | 30   | 23   | 9    |
| Fitness equipment falls | 6    | 4    | 2    | 5    |
| Basketball falls        | 10   | 28   | 33   | 27   |
| Ice skating falls       | 12   | 35   | 12   | 7    |
| Rocking horse falls     | 1    | 2    | 0    | 1    |
| Falls while running     | 13   | 37   | 19   | 20   |
| Balance bike falls      | 4    | 5    | 7    | 3    |
| Swing falls             | 1    | 4    | 4    | 3    |
| Ski falls               | 0    | 1    | 0    | 0    |

|                           |    |    |    |    |
|---------------------------|----|----|----|----|
| Parallel bar falls        | 0  | 1  | 0  | 0  |
| Others                    | 0  | 0  | 1  | 0  |
| Taekwondo falls           | 3  | 4  | 4  | 3  |
| Kick injuries             | 5  | 2  | 7  | 1  |
| Dance falls               | 7  | 5  | 3  | 2  |
| Playground falls          | 3  | 6  | 3  | 2  |
| Falls during physical     |    |    |    |    |
| Education activities      | 5  | 11 | 8  | 2  |
| Soccer falls              | 2  | 13 | 12 | 7  |
| Jump rope falls           | 1  | 0  | 1  | 0  |
| Swimming-related injuries | 0  | 0  | 1  | 0  |
| Martial arts falls        | 0  | 2  | 3  | 0  |
| Birth injuries            | 20 | 22 | 15 | 10 |
| Abuse injuries            | 3  | 1  | 0  | 0  |
| Iatrogenic injuries       | 0  | 2  | 1  | 0  |
| Unknown                   | 12 | 11 | 10 | 9  |

---
